# Supplementary figures and images for: Lymph Node Ratio Rather Than Positive Lymph Node Counts Has Better Prognostic Value in Patients With Testicular Germ Cell Tumors
Source: PubMed Central journal article supplement — Technol Cancer Res Treat. 2021 Jan 18;20:1533033820979702. doi: 10.1177/1533033820979702 (PMC7816529; doi:10.1177/1533033820979702), 2021-01-18

**Figure S1**

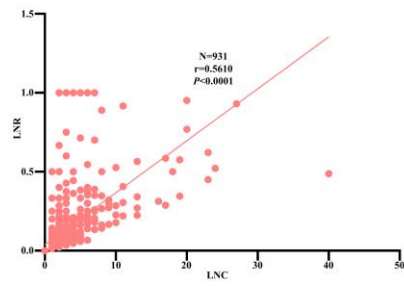

Figure S1 The correlation between LNR and LNC in male germ cell tumors

Supplement: Figure_S1.pdf [file Figure_S1.pdf]
